# Supplementary material for: Targeting the Mouse Ventral Hippocampus in the Intrahippocampal Kainic Acid Model of Temporal Lobe Epilepsy
Source: eNeuro. 2018 Aug 8;5(4):ENEURO.0158-18.2018. doi: 10.1523/ENEURO.0158-18.2018 (PMC6102375; doi:10.1523/ENEURO.0158-18.2018)
Supplement: Extended Data 1 — Automated ictal spike counter. We have provided the code (created in Matlab 2014b on a Windows 7 computer) to run our custom automated spike counter, used in this article to quantify electrographic seizures. The code runs as a Matlab script, which launches a customizable user interface. A detailed user guide accompanies the code. A copy of the code and user guide can also be found at the URL listed in the Methods – Code Accessibility section. Download Extended Data 1, ZIP file. [file sup_enu-eN-NWR-0158-18-s02.zip]

Archive with 14 entries (12 files):
- Electrographic Seizure Analyzer/Blinded - Electrographic Seizure Analyzer.pdf
- Electrographic Seizure Analyzer/Code 04-20-2018/
- Electrographic Seizure Analyzer/Code 04-20-2018/AnalyzeDirectory.m
- Electrographic Seizure Analyzer/Code 04-20-2018/DefaultSettings.m
- Electrographic Seizure Analyzer/Code 04-20-2018/DetermineThresholds.m
- Electrographic Seizure Analyzer/Code 04-20-2018/findallofthem.fig
- Electrographic Seizure Analyzer/Code 04-20-2018/findallofthem.m
- Electrographic Seizure Analyzer/Code 04-20-2018/FindEvents.m
- Electrographic Seizure Analyzer/Code 04-20-2018/FindNoise.m
- Electrographic Seizure Analyzer/Code 04-20-2018/MergeEvents.m
- Electrographic Seizure Analyzer/Code 04-20-2018/peakseek.m
- Electrographic Seizure Analyzer/Code 04-20-2018/SpikeFinder.m
- Electrographic Seizure Analyzer/sample file/
- Electrographic Seizure Analyzer/sample file/sample_1.mat
