# Supplementary material for: Targeting the Mouse Ventral Hippocampus in the Intrahippocampal Kainic Acid Model of Temporal Lobe Epilepsy
Source: eNeuro. 2018 Aug 8;5(4):ENEURO.0158-18.2018. doi: 10.1523/ENEURO.0158-18.2018 (PMC6102375; doi:10.1523/ENEURO.0158-18.2018)
Supplement: Extended Data 1 — Automated ictal spike counter. We have provided the code (created in Matlab 2014b on a Windows 7 computer) to run our custom automated spike counter, used in this article to quantify electrographic seizures. The code runs as a Matlab script, which launches a customizable user interface. A detailed user guide accompanies the code. A copy of the code and user guide can also be found at the URL listed in the Methods – Code Accessibility section. Download Extended Data 1, ZIP file. [file sup_enu-eN-NWR-0158-18-s02.zip › Electrographic Seizure Analyzer/Code 04-20-2018/peakseek.m]

function [locs pks]=peakseek(x,minpeakdist,minpeakh)
% Alternative to the findpeaks function.  This thing runs much much faster.
% It really leaves findpeaks in the dust.  It also can handle ties between
% peaks.  Findpeaks just erases both in a tie.  Shame on findpeaks.
%
% x is a vector input (generally a timecourse)
% minpeakdist is the minimum desired distance between peaks (optional, defaults to 1)
% minpeakh is the minimum height of a peak (optional)
%
% (c) 2010
% Peter O'Connor
% peter<dot>ed<dot>oconnor .AT. gmail<dot>com

if size(x,2)==1, x=x'; end

% Find all maxima and ties
locs=find(x(2:end-1)>=x(1:end-2) & x(2:end-1)>=x(3:end))+1;

if nargin<2, minpeakdist=1; end % If no minpeakdist specified, default to 1.

if nargin>2 % If there's a minpeakheight
    locs(x(locs)<=minpeakh)=[];
end

if minpeakdist>1
    while 1

        del=diff(locs)<minpeakdist;

        if ~any(del), break; end

        pks=x(locs);

        [garb mins]=min([pks(del) ; pks([false del])]); %#ok<ASGLU>

        deln=find(del);

        deln=[deln(mins==1) deln(mins==2)+1];

        locs(deln)=[];

    end
end

if nargout>1,
    pks=x(locs);
end


end
